# Supplementary material for: Applications of artificial neural networks in health care organizational decision-making: A scoping review
Source: PubMed Central journal article supplement (PMC6380578; doi:10.1371/journal.pone.0212356), 2019-02-19
Supplement: pone.0212356.s002.pdf [file pone.0212356.s002.pdf]

**Discipline: Business and Management**

|               |                                                                                                                                                                                                                                                                                                                                                                                                                                                                                                                                                                                                                                                                               |
|---------------|-------------------------------------------------------------------------------------------------------------------------------------------------------------------------------------------------------------------------------------------------------------------------------------------------------------------------------------------------------------------------------------------------------------------------------------------------------------------------------------------------------------------------------------------------------------------------------------------------------------------------------------------------------------------------------|
| Database      | ABI/Inform Global                                                                                                                                                                                                                                                                                                                                                                                                                                                                                                                                                                                                                                                             |
| Search Syntax | ((((artificial neural network) OR (neural net) OR (neural AND nets) OR (artificial neural networks)) AND ((health care organization) OR (health organization) OR (health care organization) OR (health care organisation) OR (health care AND management)) AND ((a decision making model) OR (decision AND support) OR decision)) AND peer(yes) AND (stype.exact("Scholarly Journals" OR "Conference Papers & Proceedings") AND la.exact("ENG"))                                                                                                                                                                                                                              |
|               | ((MAINSUBJECT.EXACT("Decision support systems") OR MAINSUBJECT.EXACT("Neural networks") OR MAINSUBJECT.EXACT("Expert systems") OR MAINSUBJECT.EXACT("Intelligence") OR MAINSUBJECT.EXACT("Fuzzy logic")) AND (MAINSUBJECT.EXACT("Health care") OR MAINSUBJECT.EXACT("Health care management") OR MAINSUBJECT.EXACT("Health care networks") OR MAINSUBJECT.EXACT("Health care delivery"))) AND peer(yes) AND stype.exact("Scholarly Journals" OR "Conference Papers & Proceedings")                                                                                                                                                                                            |
| Database      | JSTOR                                                                                                                                                                                                                                                                                                                                                                                                                                                                                                                                                                                                                                                                         |
| Search Syntax | (((artificial neural network* ) OR (machine learning)) OR (artificial intelligence)) AND (healthcare organi?ation)) AND (decision making))<br>Narrow by:<br>Item Type: Articles, Research Reports<br>Language: English<br>Subject: Biological Sciences, Business, Communication Studies, Developmental & Cell Biology, Economics, Education, Engineering, Finance, General Science, Health Policy, Health Sciences, History of Science, Labor & Employment Relations, Library Science, Management & Organizational Behavior, Mathematics, Political Science, Population Studies, Psychology, Public Health, Public Policy & Administration, Sociology, Statistics, Technology |

**Discipline: Computer Science**

|               |                                                                                                                                                                                                                                                                                                                                                                     |
|---------------|---------------------------------------------------------------------------------------------------------------------------------------------------------------------------------------------------------------------------------------------------------------------------------------------------------------------------------------------------------------------|
| Database      | Advanced Technologies and Aerospace Database                                                                                                                                                                                                                                                                                                                        |
| Search Syntax | 2 + Limit: Scholarly Journals and Conference Papers/Proceedings<br>((MAINSUBJECT.EXACT("Decision support systems") OR MAINSUBJECT.EXACT("Neural networks") OR MAINSUBJECT.EXACT("Expert systems") OR MAINSUBJECT.EXACT("Intelligence") OR MAINSUBJECT.EXACT("Fuzzy logic")) AND (MAINSUBJECT.EXACT("Health care") OR MAINSUBJECT.EXACT("Health care management") OR |

|                  |                                                                                                                                                                                            |
|------------------|--------------------------------------------------------------------------------------------------------------------------------------------------------------------------------------------|
|                  | MAINSUBJECT.EXACT("Health care networks") OR<br>MAINSUBJECT.EXACT("Health care delivery")) AND peer(yes) AND<br>stype.exact("Scholarly Journals" OR "Conference Papers &<br>Proceedings")) |
| Database         | ACM Digital Library                                                                                                                                                                        |
| Search<br>Syntax | (+artificial +neural +network* health care healthcare decision making<br>decision-making organization* organisation*)                                                                      |

### Discipline: Health Administration

|                  |                                                                                                                                                                                                                                                                |
|------------------|----------------------------------------------------------------------------------------------------------------------------------------------------------------------------------------------------------------------------------------------------------------|
| Database         | Ovid Healthstar 1966 to November 2017                                                                                                                                                                                                                          |
| Search<br>Syntax |                                                                                                                                                                                                                                                                |
| #                | Searches                                                                                                                                                                                                                                                       |
| 1                | exp Algorithms/ or exp "Neural Networks (Computer)"/                                                                                                                                                                                                           |
| 2                | exp Artificial Intelligence/ or exp Expert Systems/                                                                                                                                                                                                            |
| 3                | exp Machine Learning/                                                                                                                                                                                                                                          |
| 4                | 1 or 2 or 3                                                                                                                                                                                                                                                    |
| 5                | exp Health Services Administration/ or exp "Delivery of Health Care"/ or<br>exp Health Facility Administrators/                                                                                                                                                |
| 6                | exp Decision Making, Organizational/                                                                                                                                                                                                                           |
| 7                | exp Decision Making/                                                                                                                                                                                                                                           |
| 8                | 6 or 7                                                                                                                                                                                                                                                         |
| 9                | 4 and 5 and 8                                                                                                                                                                                                                                                  |
| 42               | limit 9 to english                                                                                                                                                                                                                                             |
| Database         | Ovid MEDLINE: Epub Ahead of Print, In-Process & Other Non-Indexed<br>Citations, Ovid MEDLINE® Daily and Ovid MEDLINE® 1946-Present                                                                                                                             |
| Search<br>Syntax |                                                                                                                                                                                                                                                                |
| #                | Searches                                                                                                                                                                                                                                                       |
| 1                | exp Artificial Intelligence/ or exp Algorithms/ or exp "Neural Networks<br>(Computer)"/                                                                                                                                                                        |
| 2                | exp Machine Learning/                                                                                                                                                                                                                                          |
| 3                | exp Fuzzy Logic/ or exp Expert Systems/                                                                                                                                                                                                                        |
| 4                | 1 or 2                                                                                                                                                                                                                                                         |
| 5                | 1 or 2 or 3                                                                                                                                                                                                                                                    |
| 6                | exp Hospital Administration/ or exp "Delivery of Health Care"/                                                                                                                                                                                                 |
| 7                | (organization and management).mp. [mp=title, abstract, original title,<br>name of substance word, subject heading word, keyword heading word,<br>protocol supplementary concept word, rare disease supplementary<br>concept word, unique identifier, synonyms] |
| 8                | exp Decision Making/                                                                                                                                                                                                                                           |
| 9                | 6 or 7 or 8                                                                                                                                                                                                                                                    |
| 10               | 4 and 9                                                                                                                                                                                                                                                        |
| 11               | 5 and 9                                                                                                                                                                                                                                                        |

|    |                              |
|----|------------------------------|
| 12 | 5 and 6                      |
| 13 | 5 and 7                      |
| 81 | limit 13 to english language |
