# Supplementary material for: Applications of artificial neural networks in health care organizational decision-making: A scoping review
Source: PubMed Central journal article supplement (PMC6380578; doi:10.1371/journal.pone.0212356), 2019-02-19
Supplement: pone.0212356.s003.pdf [file pone.0212356.s003.pdf]

| <b>Author</b>         | <b>Year</b> | <b>Study Area</b>               | <b>Study Aim</b>                                                                                                                 | <b>Objective for using ANN</b> | <b>Taxonomy used</b>                      | <b>Sample size (N), training/test size</b>                                                      | <b>Reported Accuracy Rate %</b> |
|-----------------------|-------------|---------------------------------|----------------------------------------------------------------------------------------------------------------------------------|--------------------------------|-------------------------------------------|-------------------------------------------------------------------------------------------------|---------------------------------|
| Acharya, U. R. et al. | 2013        | Cardiovascular, Medical Imaging | Compare computer aided diagnostic (CAD) techniques to effectively differentiate between symptomatic and asymptomatic patients    | Classification                 | Radial basis probabilistic neural network | N = 146 images<br>N = 346 images<br><br>Training: 2/3 of dataset<br><br>Testing: 1/3 of dataset | 93.1% and 85.3%                 |
| Aguiar, F. S., et al. | 2016        | Infectious Disease              | Develop and evaluate ANN models for classification and risk group assignment for pulmonary tuberculosis in hospitalized patients | Diagnosis                      | SOM, MLP                                  | N = 315 cases                                                                                   | 81%                             |
| Ahmed, S. S. et al.   | 2017        | Chron's Disease                 | Classification of Chron's Disease medical images using neuro-fuzzy automated classification                                      | Diagnosis                      | Hybrid: BPNN, Neurofuzzy model            | N = 387 patients                                                                                | 97.67%                          |

|                         |      |                                                             |                                                                                                                  |                 |                                                                    |                                                        |                                                                |
|-------------------------|------|-------------------------------------------------------------|------------------------------------------------------------------------------------------------------------------|-----------------|--------------------------------------------------------------------|--------------------------------------------------------|----------------------------------------------------------------|
| Aktaruzzaman, M. et al. | 2015 | Sleep                                                       | Improve the automatic distinction of sleep states using heart rate variability based features only               | Classification  | FFNN                                                               | N = 20 polysomnographic recordings                     | 68.4% to 83.8% (REM vs NREM)<br>67.6% to 71.3% (WAKE vs SLEEP) |
| Amer, M. B. et al.      | 2011 | Potassium Disturbances                                      | Propose a neural fuzzy system for diagnosis of potassium disturbances                                            | Diagnosis       | Hybrid: Neuro-fuzzy                                                | N = 63 subjects<br>Training set: 63<br>Testing set: 16 | 87%                                                            |
| Anderson, I. et al.     | 2007 | Physical Activity                                           | Explore potential use of an unaugmented commodity technology (mobile phone) as a health promotion tool           | Analysis        | ANN                                                                | N = 9 participants                                     | 70%                                                            |
| Atoui, H., et al.       | 2008 | Cardiovascular, Telemedicine                                | Present an overview of an intelligent portable ECG monitor                                                       | Decision-making | Hybrid: ANN, Fuzzy logic                                           | N/A                                                    | N/A                                                            |
| Bajo, J., et al.        | 2009 | Telemedicine, Organizational Behaviour: Case-based planning | Present an intelligent environment developed for monitoring patients case based planning in hospital environment | Decision-making | Hybrid: RTPW (routing problems with time windows) based on Kohonen | N = 200 cases                                          | N/A                                                            |

|                                |      |                                                       |                                                                                                                              |                     |          |                                                                                              |             |
|--------------------------------|------|-------------------------------------------------------|------------------------------------------------------------------------------------------------------------------------------|---------------------|----------|----------------------------------------------------------------------------------------------|-------------|
|                                |      |                                                       |                                                                                                                              |                     | networks |                                                                                              |             |
| Barriga, A. et al.             | 2016 | Telemedicine, Rehabilitation, Fall Detection, Elderly | Propose a vision-based system as an automatic, non-intrusive solution for telerehabilitation and telecare for elderly people | Pattern recognition | ANN      | N/A                                                                                          | N/A         |
| Belmonte, M.                   | 1997 | Other: Autism; Medical Imaging (EEG)                  | Application of ANN to predict behavioural performance among autistic people from EEG analysis                                | Classification      | FFNN     | N = 399 autistic auditory, N= 365 autistic visual, N=96 normal auditory, N=105 normal visual | minimum 80% |
| Berardi, V. L., & Zhang, G. P. | 1999 | Medical Diagnosis, Finance                            | To investigate effects of unequal misclassification costs in the performance of neural network classifiers                   | Classification      | ANN      | N = 7,200 cases<br>Training set: 75%<br>Testing set: 25%                                     | N/A         |

|                       |      |                                                 |                                                                                                                                                                 |                                 |                                  |                                                                                      |                                     |
|-----------------------|------|-------------------------------------------------|-----------------------------------------------------------------------------------------------------------------------------------------------------------------|---------------------------------|----------------------------------|--------------------------------------------------------------------------------------|-------------------------------------|
| Boilot, P. et al.     | 2002 | Infectious disease                              | Use an electronic nose to detect and classify bacteria in eye and ENT infections                                                                                | Classification                  | MLP, Radial Basis Function (RBF) | N=180 readings; 6 bacteria x 3 dilutions x 10 readings (eye)<br>N=129 readings (ENT) | 97.3% (Eye bacteria)<br>97.6% (ENT) |
| Bourdès, V. et al.    | 2011 | Cardiovascular, Pharmacology                    | Identify determinants of persistence of evidence-based cardiovascular medications                                                                               | Prediction                      | MLP                              | N = 4850 patients<br><br>Training set: 70%<br>Testing set: 30%                       | N/A                                 |
| Buscema, P. M. et al. | 2017 | Organizational Behaviour: Healthcare Corruption | Analyse the phenomenon of corruption in the health sector across the world                                                                                      | Analysis                        | Other: Auto-contractive map      | N = 107 observations                                                                 | N/A                                 |
| Cao, Q. et al.        | 2012 | Finance                                         | Compare accuracy of linear autoregressive moving average (ARMA) model and nonlinear neural network model in producing forecasts of medical cost inflation rates | Forecasting, Hypothesis testing | FFNN                             | N = 139 monthly observations                                                         | N/A                                 |

|                     |      |                                                                    |                                                                                                                           |                  |      |                                                                                                                                                  |        |
|---------------------|------|--------------------------------------------------------------------|---------------------------------------------------------------------------------------------------------------------------|------------------|------|--------------------------------------------------------------------------------------------------------------------------------------------------|--------|
| Carlucci, D. et al. | 2013 | Organizational Behaviour: Service quality and patient satisfaction | Understand key service quality dimensions from the outpatients point of view                                              | Identify factors | ANN  | N = 547 questionnaires                                                                                                                           | N/A    |
| Cevenini, G. et al. | 2008 | Maternal-fetal Health, Medical Imaging                             | Estimate fetal weight using ANN with echobiometric parameters (i.e. ultrasound)                                           | Prediction       | FFNN | N=4075 fetuses<br>Training set: 1600<br>Validation set: 1600<br>Testing set: 875<br><br>System applied in clinical practice to 61 pregnant women | N/A    |
| Chao, C. et al.     | 2012 | Renal Disease                                                      | Construct prognosis model for dialysis-related conditions in the surgical ICU                                             | Classification   | ANN  | N = 243 patients                                                                                                                                 | 86.26% |
| Chesney, T. et al.  | 2006 | Trauma                                                             | Comparison of data analysis of trauma data using ANN and logistic regression                                              | Prediction       | ANN  | N = 1,658 records                                                                                                                                | 80%    |
| Chong, A. et al.    | 2015 | Organizational Behaviour: Health technology assessment/adoption    | Exploring the role of unified theory of acceptance and use of technology, demographics & personality in adoption of radio | Prediction       | BPNN | N = 252 physicians and nurses<br>Training set: 90%<br>Testing set: 10%                                                                           | N/A    |

|                               |      |                                                   |                                                                                                          |                 |                                                            |                                                       |                                       |
|-------------------------------|------|---------------------------------------------------|----------------------------------------------------------------------------------------------------------|-----------------|------------------------------------------------------------|-------------------------------------------------------|---------------------------------------|
|                               |      |                                                   | frequency identification (RFID) technology in a clinical setting                                         |                 |                                                            |                                                       |                                       |
| Delen, D. et al.              | 2012 | Cardiovascular, Surgery                           | Illustrate predictive and explanatory analysis of large data sets                                        | Prediction      | MLP                                                        | N = 60,000 admission records                          | 87.74%                                |
| Emanet, N. et al.             | 2014 | Pulmonary disease                                 | Develop diagnostic tool for pulmonary diseases as a decision support tool using machine learning methods | Classification  | MLP                                                        | N=40 patients, 20 diagnosed with asthma and 20 normal | 80% (85% when FEV and FVC1 are added) |
| Ernest Preston, G. et al.     | 2002 | Organizational behaviour: ICU resource management | Develop and compare a neural network model for predicting ICU survival to logistic regression model      | Prediction      | ANN                                                        | N = 2,200 cases                                       | 79.50%                                |
| Eswaran, C., & Logeswaran, R. | 2012 | Organizational Behaviour: Decision-making         | Present a dual hybrid model for support of health care decision making                                   | Forecasting     | Hybrid: linear regression, neural network and fuzzy models | N/A                                                   | N/A                                   |
| Goodey RD, et al.             | 2000 | Referral, Oral Care                               | Evaluate three primary to secondary                                                                      | Decision-Making | ANN                                                        | N = 107 referral decisions                            | 75%                                   |

|                       |      |                                                   |                                                                                                                                                    |                                             |                                               |                                                                                                 |     |
|-----------------------|------|---------------------------------------------------|----------------------------------------------------------------------------------------------------------------------------------------------------|---------------------------------------------|-----------------------------------------------|-------------------------------------------------------------------------------------------------|-----|
|                       |      |                                                   | care referral strategies                                                                                                                           |                                             |                                               |                                                                                                 |     |
| Grossi E, et al.      | 2014 | Cardiovascular, Clinical Psychology, Telemedicine | Provide a semantic map analysis of underlying connection scheme among several psychological variables within a single individual among HF patients | Pattern recognition, Identify relationships | Other: Auto Contractive Map                   | N = 9 patients                                                                                  | N/A |
| Gunasekaran M, et al. | 2017 | Cardiovascular                                    | Diagnose heart disease                                                                                                                             | Diagnosis                                   | Hybrid: ANFIS, multiple kernel learning (MKL) | N = 250 observations                                                                            | N/A |
| Hanafizadeh P, et al. | 2010 | Organizational Behaviour: Employee motivation     | Evaluate effect of motivation of hospital employees on patient satisfaction                                                                        | Pattern recognition                         | ANN                                           | N = 300 questionnaires<br><br>Training set: 70 questionnaires<br>Testing set: 30 questionnaires | N/A |
| Hassan Y, et al.      | 2002 | Medical Diagnosis                                 | Propose methodology for hybrid system (combining neural network systems with rough sets theory) used for                                           | Preference, Classification                  | Hybrid: Rough neural networks                 | N= 178 patients<br>N= 246 patients<br><br>Training set: 50%<br>Testing set: 50%                 | N/A |

|                    |      |                             |                                                                                                                                                 |                                    |                                             |                                                                           |        |
|--------------------|------|-----------------------------|-------------------------------------------------------------------------------------------------------------------------------------------------|------------------------------------|---------------------------------------------|---------------------------------------------------------------------------|--------|
|                    |      |                             | decision and classification support                                                                                                             |                                    |                                             |                                                                           |        |
| Houston AL, et al. | 1999 | Cancer, Information Systems | Propose an architecture usable by medical knowledge information systems that will permit data mining across several medical information sources | Clustering, Identify relationships | Hybrid: Hopfield and Kohonen neural network | N/A                                                                       | N/A    |
| Hsu S, et al.      | 2008 | Finance                     | Propose alternative risk adjustment model                                                                                                       | Risk Adjustment                    | Hybrid: SOM, BPNN                           | N = 5,557 individuals                                                     | N/A    |
| Ibrahim F, et al.  | 2010 | Infectious Disease          | Diagnose and classify early risk in dengue patients using bioelectrical impedance analysis (BIA) and artificial neural network (ANN).           | Diagnosis, Classification          | MFNN                                        | N = 430 patients<br><br>Training set: (303) 70%<br>Testing set: (127) 30% | 96.27% |
| #VALUE!            | 2015 | Cardiovascular, Data Mining | Study and compare single data mining techniques with hybrid to predict heart disease diagnosis and                                              | Diagnosis                          | ANN                                         | N/A                                                                       | N/A    |



|                       |      |                                                              |                                                                                                                                        |                |           |                                       |            |
|-----------------------|------|--------------------------------------------------------------|----------------------------------------------------------------------------------------------------------------------------------------|----------------|-----------|---------------------------------------|------------|
|                       |      |                                                              | formulate treatment plan                                                                                                               |                |           |                                       |            |
| Jamei, M. et al.      | 2017 | Readmissions                                                 | Develop and pilot a predictive model to accurately identify high-risk patients                                                         | Prediction     | ANN       | N = 323,813 inpatient stays           | 95%        |
| Karan O. et al.       | 2012 | Diabetes                                                     | Diagnose diabetes as a case study                                                                                                      | Classification | MLP, FFNN | Training set: 456<br>Testing set: N/A | N/A        |
| Kudyba S, Gregorio T. | 2010 | Organizational Behaviour: Factors impacting patient outcomes | Identify factors within the patient treatment and outcomes process that produce high variances (e.g. excesses) in performance metrics. | Analysis       | ANN       | N= 43,000 cases                       | N/A        |
| Kudyba S, et al.      | 2006 | Finance, Chronic Disease                                     | Illustrate predictive modelling techniques to identify sources of future high resource demand                                          | Prediction     | ANN       | N = 54,206 health plan members        | 81% to 83% |
| Kulkarni P, et al.    | 2016 | Readmissions                                                 | Compare statistical approaches for predicting the likelihood of readmission to hospital within 30 days of discharge                    | Prediction     | ANN       | Training set: 75%<br>Testing set: 25% | 100%       |

|                      |      |                                                  |                                                                                                                                |                                       |                                                                                       |                                                                    |                                                            |
|----------------------|------|--------------------------------------------------|--------------------------------------------------------------------------------------------------------------------------------|---------------------------------------|---------------------------------------------------------------------------------------|--------------------------------------------------------------------|------------------------------------------------------------|
| Kupusinac A, et al.  | 2016 | Cardiovascular                                   | Promote cardiometabolic risk estimation that saves time and money                                                              | Risk Estimation                       | Hybrid: ANNs guided by evolutionary algorithm                                         | N = 2191 patients                                                  | 90%                                                        |
| Lamers SL, et al.    | 2008 | Infectious Disease, Genotypic testing            | Evaluate different strategies of feature selection and neural network optimization                                             | Prediction                            | Hybrid: Evolved ANNs                                                                  | N = 149 sequences                                                  | 75.50%                                                     |
| Larder B, et al.     | 2008 | Pharmacology, Infectious Disease                 | Development and application of ANN models as alternative tools for interpretation of HIV genotypic drug resistance data        | Prediction , Model treatment response | ANN                                                                                   | N = 351patients (prediction)<br>N = 511 patients (treatment model) | 87% for prediction<br>78% for modelling treatment response |
| Lee CW, Jung-A P.    | 2001 | Infectious Disease                               | Provide correct classifications of AIDS versus HIV status patients                                                             | Classification                        | ANN                                                                                   | Training set: 1026 patterns<br>Test set: 145 patterns              | 64% to 65%                                                 |
| Lim CW, Kirikoshi T. | 2008 | Organizational Behaviour: Prescription behaviour | Build predictive models for understanding the relevance and limitations of promotional spending on prescription responsiveness | Analysis                              | Hybrid: Genetic algorithm-partial least squares (GAPLS) analysis with neural networks | N = 3 major brands with 11 data variables                          | N/A                                                        |

|                       |      |                                             |                                                                                                          |                    |                                           |                                |                                                 |
|-----------------------|------|---------------------------------------------|----------------------------------------------------------------------------------------------------------|--------------------|-------------------------------------------|--------------------------------|-------------------------------------------------|
| Lin C. e al.          | 2014 | Pain Management                             | Propose a decision-making framework for adaptive pain management                                         | Approximation      | ANN                                       | N = 89 patients                | N/A                                             |
| Lin, W-B.             | 2013 | Organizational Behaviour: Crisis Management | Investigate crisis management mechanisms in hospitals                                                    | Hypothesis testing | Hybrid: Nonlinear fuzzy                   | N = 159 data points            | N/A                                             |
| Lin W-B et al.        | 2016 | Organizational Behaviour: Crisis Management | Discuss management variables influencing the mechanism of crisis management in public hospitals          | Hypothesis testing | Hybrid: Nonlinear fuzzy                   | N = 159 data points            | N/A                                             |
| Liu N.T. et al.       | 2014 | Trauma                                      | Develop and validate a model for predicting the need for life saving interventions among trauma patients | Prediction         | MLP                                       | N = 79 patients                | 89.80%                                          |
| Ma C-M. et al.        | 2012 | Renal disease                               | Construct a prognosis model for predicting death and dialysis in ICUs                                    | Prediction         | MLP                                       | N = 293 patients               | Death dataset: 89.2%<br>Dialysis dataset: 91.1% |
| Makantasis, K. et al. | 2016 | Fall Detection, Elderly                     | Propose a fall detection system that uses 2D image analysis and relationship between camera coordinate   | Classification     | Hybrid: FFNN and Island Genetic Algorithm | N =50 fall incidents (minimum) | 90% to 97%                                      |

|                         |      |                                           |                                                                                                                                                 |                 |     |                                                                   |        |
|-------------------------|------|-------------------------------------------|-------------------------------------------------------------------------------------------------------------------------------------------------|-----------------|-----|-------------------------------------------------------------------|--------|
|                         |      |                                           | system and real 3D space.                                                                                                                       |                 |     |                                                                   |        |
| Malliaris ME, Pappas M. | 2011 | Finance                                   | Compare two models built to determine best indicators of revenue generation among nonprofit foundations supporting hospitals of different sizes | Model Revenue   | ANN | N = 182 hospitals                                                 | 99.80% |
| Marble RP, Healy JC.    | 1999 | Trauma                                    | Introduce the application of artificial neural networks to trauma complications assessment                                                      | Diagnosis       | ANN | N = 912 trauma cases<br>Training set: 256<br>Testing set: 259     | N/A    |
| Mobley BA, et al.       | 2000 | Cardiovascular                            | Produce a prototype of a neural network system that can detect patients who do not need coronary angiography                                    | Prediction      | ANN | N = 763 patients<br>Training: 332 records<br>Testing: 100 records | N/A    |
| Okoroh MI, et al.       | 2006 | Organizational Behaviour: Risk Management | Provide optimum solution and best value approach for managing healthcare non-clinical services                                                  | Risk Assessment | ANN | N = 60 managers<br>Testing set: 340 cases<br>Training set: 85     | N/A    |

|                           |      |                                                               |                                                                                                                                                              |                            |                                |                                                                                  |                  |
|---------------------------|------|---------------------------------------------------------------|--------------------------------------------------------------------------------------------------------------------------------------------------------------|----------------------------|--------------------------------|----------------------------------------------------------------------------------|------------------|
|                           |      |                                                               | and possible risky support service encounters                                                                                                                |                            |                                | cases                                                                            |                  |
| Okoroh, M. I. et al.      | 2007 | Organizational Behaviour: Non-clinical health care management | Create a national healthcare service facilities risk exposure system allowing healthcare managers to provide an early warning signal to health care managers | Prediction                 | BPNN                           | N= 60 healthcare operators                                                       | N/A              |
| Olatubosun O. et al.      | 2015 | Diabetes                                                      | To diagnose diabetes                                                                                                                                         | Diagnosis                  | Other: Maximum Covariance BPNN | N = 442 patients<br>Training set: 70%<br>Testing set: 15%<br>Validating set: 15% | 90.9% to 100%    |
| Oliva JT, Garcia Rosa JL. | 2017 | Epilepsy; Medical Imaging (EEG)                               | Verify if the choice of an epileptic EEG segment as reference can affect performance of classifiers built from data                                          | Classification, Prediction | MLP, BPNN                      | N=200 EEG segments<br><br>(100 normal and 100 epileptic)                         | 100%             |
| Oztekin, A.               | 2012 | Surgery (Transplantation)                                     | Develop models to predict performance of thoracic                                                                                                            | Prediction                 | ANN                            | N = 6,1391 records and 443 variables                                             | 78.15% to 82.24% |

|                           |      |                                                                           |                                                                                                                                                                   |                    |      |                                                                                                        |                                                                  |
|---------------------------|------|---------------------------------------------------------------------------|-------------------------------------------------------------------------------------------------------------------------------------------------------------------|--------------------|------|--------------------------------------------------------------------------------------------------------|------------------------------------------------------------------|
|                           |      |                                                                           | transplants                                                                                                                                                       |                    |      |                                                                                                        |                                                                  |
| Pappada S.M. et al.       | 2013 | Trauma, Surgery                                                           | Evaluate a model for glucose prediction in critically ill trauma and post-operative cardiothoracic surgical patients                                              | Prediction         | FFNN | Training set: 14 patients<br>Testing set: 5 patients<br><br>Training set: 19,989<br>Testing set: 9,405 | 53.6% for high glucose values<br>96.7% for normal glucose values |
| Pendharkar PC, Rodger JA. | 2003 | Organizational Behaviour: Factors impacting estimating resources required | Demonstrate using a data envelopment analysis (DEA) model to screen training cases and application of ANN to forecast number of employees in health care industry | Forecasting        | BPNN | N = 175 hospitals<br><br>Training set: 100 hospitals<br>Testing set: 75 hospitals                      | 54.7% to 100%                                                    |
| Pernek I, Ferscha A.      | 2017 | Surgery                                                                   | Review literature on different approaches for recognition of context in surgery                                                                                   | Classification     | ANN  | N/A                                                                                                    | N/A                                                              |
| Pogorelc B, et al.        | 2012 | Elderly                                                                   | Propose a system for the early recognition of health problems manifesting in form of gait                                                                         | Hypothesis testing | ANN  | N = 9 subjects<br><br>Dataset: 141 recordings                                                          | 95% to 100%                                                      |

|                               |      |                                                         |                                                                                                                        |                |                                            |                                                                |        |
|-------------------------------|------|---------------------------------------------------------|------------------------------------------------------------------------------------------------------------------------|----------------|--------------------------------------------|----------------------------------------------------------------|--------|
| Pollettini J.T. et al.        | 2012 | Organizational Behaviour: Pediatric health surveillance | Create a computer-aided automatic assignment of patient surveillance levels                                            | Classification | MLP                                        | N=100 medical records<br>Training set: 90%<br>Testing set: 10% | 64.40% |
| Rangayyan, R. M., & Wu, Y. F. | 2008 | Osteoarthritis, Screening                               | Propose use of statistical parameters of vibroarthrographic signals                                                    | Classification | ANN                                        | N = 89 VAG signals                                             | 82%    |
| Samanta, B., & Nataraj, C.    | 2008 | Cardiovascular                                          | Compare soft computing techniques (GA-ANFISH and GA-ANN) for diagnosis of heart conditions                             | Classification | Hybrid: ANFIS, Genetic Algorithm-ANN (MLP) | N/A                                                            | 100%   |
| Sangi M. et al.               | 2015 | Diabetes                                                | Develop a risk advisor model to predict the chances of diabetes complications according to the changes in risk factors | Prediction     | ANN                                        | N/A                                                            | N/A    |

|                     |      |                    |                                                                                                                                                                      |                |                  |                                                                       |                                                                                                 |
|---------------------|------|--------------------|----------------------------------------------------------------------------------------------------------------------------------------------------------------------|----------------|------------------|-----------------------------------------------------------------------|-------------------------------------------------------------------------------------------------|
| See CK, et al.      | 2010 | Diabetes           | Identify plantar pressure distribution in normal patients, type-2 diabetes with or without neuropathy                                                                | Classification | BPNN             | N=85 patients                                                         | 87.5% for diabetic patients without neuropathy<br><br>75% for diabetic patients with neuropathy |
| Shang J.S. et al.   | 2000 | Infectious Disease | Derive and validate use of neural networks and logistic regression for diagnosis of community acquired Methicillin-resistant Staphylococcus aureus (MRSA) infections | Diagnosis      | ANN              | Training set: 354 patients<br>Testing set: 118 patients               | 89.83%                                                                                          |
| Sharma DK, Hota HS. | 2013 | Dermatology        | Propose ensemble model for classification of different categories of Erythematous-Squamous diseases                                                                  | Classification | Hybrid: ANN, SVM | N = 365 instances<br>Training set: 266 (76%)<br>Testing set: 99 (27%) | 99.25% to 98.99%                                                                                |



|                        |      |                                                            |                                                                                                                                                  |                 |                                                   |                                                        |                                     |
|------------------------|------|------------------------------------------------------------|--------------------------------------------------------------------------------------------------------------------------------------------------|-----------------|---------------------------------------------------|--------------------------------------------------------|-------------------------------------|
| Sheikhtaheri A. et al. | 2014 | Organizational Behaviour: Clinical decision-making; Review | Review challenges associated with the use of ANN in clinical decision-making                                                                     | Classification  | ANN                                               | Various                                                | 90-100%                             |
| Singh K et al.         | 2016 | Telemedicine                                               | Integrate artificial neural intelligence in domain of healthcare monitoring                                                                      | Decision-making | Hybrid: ANFIS                                     | N/A                                                    | N/A                                 |
| Süt N, Senocak M.      | 2007 | Cardiovascular                                             | Compare predictive accuracies of diagnosis of coronary artery disease using different types of artificial neural network and statistical methods | Diagnosis       | MLP, RNN                                          | N = 1803 cases                                         | 79% to 83.9% (MLPNN)<br>84.7% (RNN) |
| Veredas F.J. et al.    | 2009 | Trauma                                                     | Use a hybrid learning approach to design a computational system for automatic tissue identification on wound images                              | Classification  | Hybrid: Bayesian networks, k neural networks, MLP | N = 113 photographs                                    | N/A                                 |
| Verma B, Hassan SZ.    | 2011 | Information Systems                                        | Present a hybrid ensemble approach for classification in medical databases                                                                       | Classification  | Hybrid: MLP, SOM, K-Means                         | N = 768 cases<br>Training set: 200<br>Testing set: 100 | 89% to 100%                         |

|                               |      |                              |                                                                                                                                                               |                     |                                                                                            |                                                                 |            |
|-------------------------------|------|------------------------------|---------------------------------------------------------------------------------------------------------------------------------------------------------------|---------------------|--------------------------------------------------------------------------------------------|-----------------------------------------------------------------|------------|
| Vivekanandan T, Iyengar NCSN. | 2017 | Cardiovascular               | Find optimal subset of attributes from complete attribute set for diagnosing heart disease                                                                    | Prediction          | Hybrid: Fuzzy AHP with FFNN                                                                | N = 300                                                         | 83% to 85% |
| Vu T.H.N. et al.              | 2010 | Cardiovascular, Telemedicine | Propose a neural network to recognize Heart Rate Variability (HRV) patterns related to coronary heart disease (CHD) risk in consideration of daily activities | Pattern recognition | Hybrid: Poincare-based HRV patterns discovering Incremental Artificial Neural Network, ANN | N = 11 scenarios<br>Each scenario gives dataset of 5400 samples | 50% to 95% |
| Waghulde NP, Patil NP.        | 2014 | Cardiovascular               | Evaluate application of neural network in predicting presence of heart disease                                                                                | Prediction          | Hybrid: Genetic Neural, BPNN, FFNN                                                         | N = 50                                                          | 84% to 98% |
| Wu H-J. et al.                | 2009 | Information Systems          | Use artificial neural network as part of location scheme that can learn geography features and adapt to the real world                                        | Analysis            | BPNN                                                                                       | Training set: 60 sets<br>Tresting set: N/A                      | 60% to 90% |

|                 |      |                                               |                                                                                                                                        |              |      |                                                                                             |     |
|-----------------|------|-----------------------------------------------|----------------------------------------------------------------------------------------------------------------------------------------|--------------|------|---------------------------------------------------------------------------------------------|-----|
| Xu M. et al.    | 2013 | Organizational Behaviour: ED patient arrivals | Provide a comprehensive comparison of different computational methods to model patient arrivals                                        | Prediction   | ANN  | Training set: 328 days<br>Testing set: 37 days<br><br>Training set: 90%<br>Testing set: 10% | N/A |
| Zear A. et al.  | 2018 | Information Systems, Telemedicine             | Propose an algorithm for multiple digital watermarking for healthcare applications in order to prevent medical patient identify theft. | Optimization | BPNN | N/A                                                                                         | N/A |
| Zhang S. et al. | 2009 | Obesity, Data Mining                          | Compare logistic regression with six data mining techniques to improve accuracy of prediction                                          | Prediction   | ANN  | N = 16,523 instances                                                                        | N/A |
